# Supplementary material for: Interleukin 4 inducible 1 gene (IL4I1) is induced in chicken phagocytes by Salmonella Enteritidis infection
Source: PubMed Central journal article supplement (PMC7222322; doi:10.1186/s13567-020-00792-y), 2020-05-13
Supplement: 13567_2020_792_MOESM3_ESM.pdf [file 13567_2020_792_MOESM3_ESM.pdf]

# Additional File 3. Nucleotide sequences of the CRISPR/Cas target region in HD11 IL4I1+/+ cells and IL4I1-/- clones.

| cells                     | 1301                |                            |                     |                            |                     | mutation                          |
|---------------------------|---------------------|----------------------------|---------------------|----------------------------|---------------------|-----------------------------------|
| HD11 IL4I1 <sup>+/+</sup> | T A C T G G G A C T | C G C C A G C G - C        | C A A G A G G T T C | T C G T G C T T C C        | C T G A G T A T T G |                                   |
|                           | T A C T G G G A C T | C G C C A G C G - C        | C A A G A G G T T C | T C G T G C T T C C        | C T G A G T A T T G |                                   |
| clone #11                 | T A C T G G G A C T | C G C C A G C G <b>C</b> C | C A A G A G G T T C | T C G T G C T T C C        | C T G A G T A T T G | frameshift insertion              |
|                           | T A C T G G G A C T | C G C C A G C G - C        | -----               | -----                      | ----- T A T T G     | frameshift deletion               |
| clone #26                 | T A C T G G G A C T | C G C C A - - G - C        | C A A G A G G T T C | T C G T G C T T C C        | C T G A G T A T T G | frameshift deletion               |
|                           | T A C T G G G A C T | C G C C A - - - - -        | -----               | ----- <b>C</b> G C T T C C | C T G A G T A T T G | frameshift deletion, substitution |
| clone #85                 | T A C T G G G A C T | C - - - - - - - -          | -----               | -----                      | ----- <b>G</b>      | frameshift deletion               |
|                           | T A C T G G G A C T | C G C C A G C G <b>C</b> C | C A A G A G G T T C | T C G T G C T T C C        | C T G A G T A T T G | frameshift insertion              |
