# Supplementary material for: Interleukin 4 inducible 1 gene (IL4I1) is induced in chicken phagocytes by Salmonella Enteritidis infection
Source: Vet Res. 2020 May 13;51:67. doi: 10.1186/s13567-020-00792-y (PMC7222322; doi:10.1186/s13567-020-00792-y)
Supplement: Supplementary file 1 — Additional file 1. Peptide sequences, fragment ion types, peptide and fragment mass-to-charge ratios and optimal collision energy in targeted LC–MS analysis. [file 13567_2020_792_MOESM1_ESM.xlsx]

## Sheet: Additional File 1
Additional File 1 - Peptide sequences, fragment ion types, peptide and fragment mass-to-charge ratios and optimal collision energy in targeted LC-MS analysis
Protein	Peptide	Fragment	Peptide [m/z]	Fragment [m/z]	Collision Energy
GAPDH	LVSWYDNEFGYSNR	y5	875.928	596.615	30
GAPDH	LVSWYDNEFGYSNR	y8	875.928	987.007	34
GAPDH	LVSWYDNEFGYSNR	y9	875.928	1102.1	28
GAPDH	LVSWYDNEFGYSNR[HeavyR]	y5	880.892	606.544	30
GAPDH	LVSWYDNEFGYSNR[HeavyR]	y8	880.892	996.936	34
GAPDH	LVSWYDNEFGYSNR[HeavyR]	y9	880.892	1112.02	28
IL4I1	SYLQYTC[Carboxyamidomethyl]DR	b2	603.266	364.417	19
IL4I1	SYLQYTC[Carboxyamidomethyl]DR	y3	603.266	450.491	19
IL4I1	SYLQYTC[Carboxyamidomethyl]DR	y7	603.266	478.256	16
IL4I1	SYLQYTC[Carboxyamidomethyl]DR[HeavyR]	b2	608.27	364.417	19
IL4I1	SYLQYTC[Carboxyamidomethyl]DR[HeavyR]	y3	608.27	460.42	19
IL4I1	SYLQYTC[Carboxyamidomethyl]DR[HeavyR]	y7	608.27	483.26	16
